# Supplementary material for: Synthesis Monitoring, Characterization and Cleanup of Ag-Polydopamine Nanoparticles Used as Antibacterial Agents with Field-Flow Fractionation
Source: MDPI journal article supplement (doi:10.3390/antibiotics11030358), 2022-03-08
Supplement: s1 [file s1]

Article

# Synthesis Monitoring, Characterization and Cleanup of Ag-Polydopamine Nanoparticles Used as Antibacterial Agents with Field-Flow Fractionation

Valentina Marassi <sup>1,2,\*</sup>, Sonia Casolari <sup>1</sup>, Silvia Panzavolta <sup>1</sup>, Francesca Bonvicini <sup>3</sup>, Giovanna Angela Gentilomi <sup>3</sup>, Stefano Giordani <sup>1</sup>, Andrea Zattoni <sup>1,2</sup>, Pierluigi Reschiglian <sup>1,2</sup> and Barbara Roda <sup>1,2</sup>

## Supplementary Materials

**Table S1.** concentration of reagents and medium used in Ag-PDA synthesis.

|           | Ag (AgNO <sub>3</sub> )<br>(mM) | Dopamine-HCl<br>(mM) | EtOH<br>(% v/v) | Ammonia<br>(% v/v) |
|-----------|---------------------------------|----------------------|-----------------|--------------------|
| R1        | 2                               | 10                   | 30              | 1                  |
| R2        | 1                               | 10                   | 30              | 1                  |
| <b>R3</b> | <b>0.5</b>                      | <b>10</b>            | <b>30</b>       | <b>1</b>           |
| R4        | 0.5                             | 2.5                  | 30              | 1                  |
| R5        | 1                               | 2.5                  | 30              | 1                  |

The synthesis of Ag-PDA nanoparticles was performed with an optimized method elaborated from literature [54-56, manuscript]. The most promising reagent ratio (green) was chosen from a screening of different Ag/Dopamine ratios shown in Table S1.

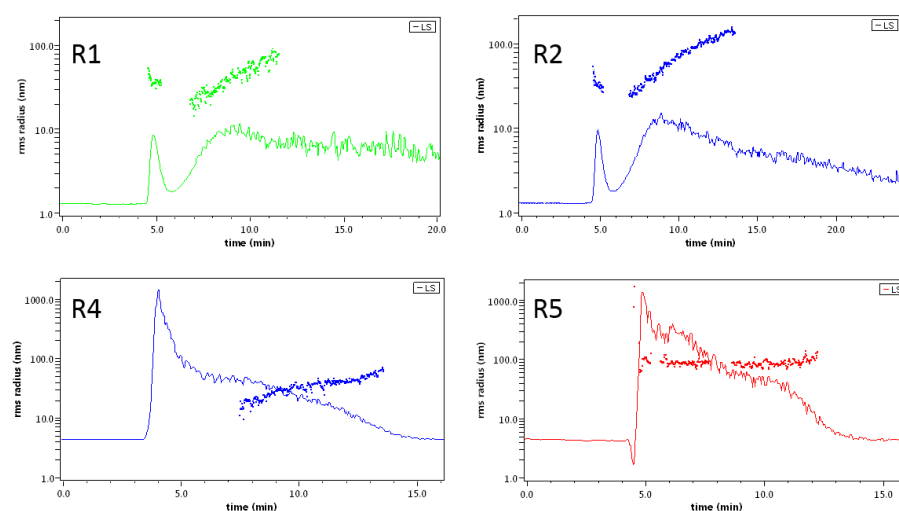

**Figure S1.** Solid line: LS profile of Ag-PDA particles obtained with R1-R2-R4-R5 Ag/DA ratios. Dotted distribution: Gyration radii.

Each reaction (R1-R5) was carried out for 30 hours. A 50  $\mu$ L aliquot was injected and analysed with FFF-multidetector to verify the formation of Ag-PDA nanoparticles.

The results showed that an increase in Ag concentration yielded less monodispersed particles, ranging from 25 to >100 nm in terms of Gyration radius (Figure S1, R1-R2).

A lower dopamine concentration led to a scarce resolution from the first population, suggesting that the formation of PDA particles was less effective. (Figure S1, R4-R5). R3 was then chosen for time monitoring, online and offline characterization, and activity tests.
